# Supplementary material for: Self-converted fabrication of a Ni-MOF-74 tubular membrane from nickel-based nanosheets for butanol dehydration by pervaporation
Source: Royal Society of Chemistry journal article supplement (doi:10.1039/d3ce01007d), 2023-01-01
Supplement: d3ce01007d1.pdf [file d3ce01007d1.pdf]

## Electronic Supplementary Information (ESI)

### **Self-converted Fabrication of Ni-MOF-74 Tubular Membrane from Nickel-based Nanosheets for Butanol Dehydration by Pervaporation**

Guoshu Gao<sup>1</sup>, Yumeng Zhao<sup>1</sup>, Peng Zhu<sup>1</sup>, Haiou Liu<sup>1</sup>, Yu Guo<sup>2\*</sup>, Xiongfeng Zhang<sup>1\*</sup>

<sup>1</sup>*School of Chemical Engineering, Dalian Key Laboratory of Membrane Materials and Membrane Processes, Dalian University of Technology, Dalian, 116024, China.*

<sup>2</sup>*School of Chemical and Environmental Engineering, Liaoning University of Technology, Jinzhou, 121001, PR China*

Corresponding author: [xfzhang@dlut.edu.cn](mailto:xfzhang@dlut.edu.cn) (X. Zhang); [guoyulnut@163.com](mailto:guoyulnut@163.com) (Y. Guo)

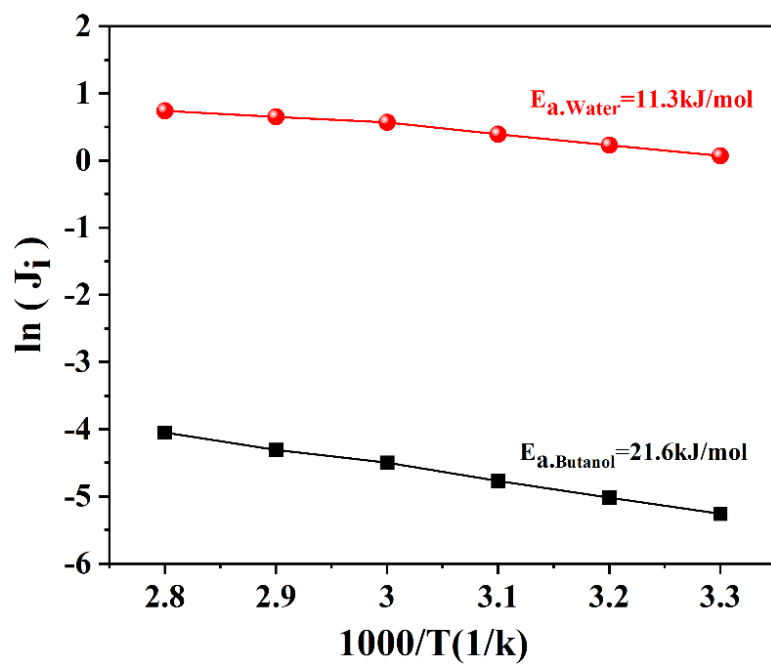

Fig. S1. Arrhenius relationship between water and n-butanol flux and feed temperature for Ni-MOF-74 membrane

Table S1 The n-butanol/water pervaporation performance of Ni-MOF-74 membrane.

| Membranes                             | Flux ( $\text{kg}\cdot\text{m}^{-2}\text{ h}^{-1}$ ) | Separation factor | Ref.             |
|---------------------------------------|------------------------------------------------------|-------------------|------------------|
| Zif-8 membrane                        | 1.45                                                 | 36.4              | 1                |
| Zn (BDC)(TED) <sub>0.5</sub> membrane | 0.57                                                 | 440               | 2                |
| ZIF-8@Ppy membrane                    | 0.56                                                 | 70.2              | 1                |
| Silicalite-1 membrane                 | 1.51                                                 | 150               | 3                |
| Graphene oxide membranes              | 3.1                                                  | 230               | 4                |
| Ceramic membrane                      | 0.4                                                  | 1340              | 5                |
| PDMS/ceramic membrane                 | 0.51                                                 | 24.7              | 6                |
| PDMS/PVDF membrane                    | 2.2                                                  | 46                | 7                |
| PIM-1/PDMS membrane                   | 1.43                                                 | 30.7              | 8                |
| NU-906 membrane                       | 0.098                                                | 2852              | 9                |
| NU-906 thin film                      | 1.45                                                 | 2630              | 9                |
| Ni-MOF-74 membrane                    | 1.75                                                 | 1093              | <b>This Work</b> |

## References

1. L. H. Xu, S. H. Li, H. Mao, A. S. Zhang, W. W. Cai, T. Wang, Z. P. Zhao, *J. Mater. Chem. A.*, 2021, **9**, 11853-11862.
2. S. N. Liu, G. P. Liu, J. Shen, W. Q. Jin, *Sep. Purif. Technol.*, 2014, **133**, 40-47.
3. D. Shen, W. Xiao, J. H. Yang, N. B. Chu, J. M. Lu, D. H. Yin, J. Q. Wang, *Sep. Purif. Technol.*, 2011, **76**, 308-315.
4. L. Chen, G. P. Zhang, H. Y. Fan, *Chin. J. Chem. Eng.*, 2015, **23**, 1102-1109.
5. A. W. Verkerk, M. A. G. Vorstman, *Sep. Purif. Technol.*, 2001, **22**, 689-695.
6. H. P. Zhu, G. P. Liu, J. W. Yuan, T. P. Chen, F. X. Xin, M. Jiang, Y. Q. Fan, W. Q. Jin, *Sep. Purif. Technol.*, 2019, **229**, 115811-115820.
7. Y. Pan, X. Zhao, G. Liu, W. Jin, Y. T. Hang, X. H. Zhao, G. P. Liu, W. Q. Jin., *J. Membr. Sci.*, 2019, **579**, 210-218.
8. G. L. Zhang, H. F. Cheng, P. C. Su, X. Zhang, J. H. Zheng, Y. H. Lu, Q. L. Liu, *Sep. Purif. Technol.*, 2019, **216**, 83-91.
9. R. Luo, Y. Li, Q. Xing, G. Liang, P. Bai, J. L. Guo, M. Tsapatsi, *Adv. Funct. Mater.*, 2023, **2213221**, 1-10.
